# Supplementary material for: Reduced body weight at weaning followed by increased post-weaning growth rate interacts with part-per-trillion fetal serum concentrations of bisphenol A (BPA) to impair glucose tolerance in male mice
Source: PLoS One. 2018 Dec 17;13(12):e0208846. doi: 10.1371/journal.pone.0208846 (PMC6296512; doi:10.1371/journal.pone.0208846)
Supplement: S3 Table — (DOCX) [file pone.0208846.s005.docx]

**S3 Table. Individual body weights, growth rates and blood glucose concentrations.**

Body weights used to calculate growth rate, in male mice perinatally exposed to BPA via maternal treatment with Silastic capsules containing 0, 6, 60 or 600 µg BPA. Also shown are the blood glucose concentrations in response to a low-dose (20 mg/kg) glucose tolerance test. *AUC units are mg/dL/min.

| | **BPA dose** | **Animal** | **Body weight (g**) | | | **Growth** | **Blood glucose concentration (mg/dL)** | | | | | | | --- | --- | --- | --- | --- | --- | --- | --- | --- | --- | --- | --- | | **µg/Capsule** | ID | Week 3 | Week 5 | % change | Tertile | 0 m | 30 m | 60 m | 120 m | AUC* | | 0 | 102-2 | 10.37 | 29.07 | 180.3 | 1 | 160 | 130 | 137 | 132 | 136.9 | | 0 | 102-3 | 11.66 | 30.21 | 159.1 | 1 | 130 | 158 | 96 | 131 | 124.3 | | 0 | 120-12 | 13.13 | 31.42 | 139.3 | 1 | 147 | 142 | 149 | 132 | 142.8 | | 0 | 102-1 | 12.56 | 30 | 138.9 | 1 | 148 | 159 | 169 | 144 | 157.6 | | 0 | 102-4 | 12.6 | 29.93 | 137.5 | 1 | 138 | 171 | 139 | 146 | 148.6 | | 0 | 120-7 | 13.37 | 31.35 | 134.5 | 1 | 182 | 144 | 158 | 171 | 160.8 | | 0 | 120-13 | 13.08 | 30.29 | 131.6 | 1 | 166 | 138 | 148 | 128 | 142.8 | | 0 | 72-2 | 13.66 | 31.2 | 128.4 | 1 | 142 | 179 | 171 | 169 | 168.9 | | 0 | 120-14 | 12.91 | 29.48 | 128.4 | 1 | 152 | 126 | 144 | 115 | 133.3 | | 0 | 102-5 | 12.92 | 29.42 | 127.7 | 2 | 145 | 190 | 167 | 159 | 168.0 | | 0 | 80-5 | 14.21 | 32.32 | 127.4 | 2 | 145 | 166 | 166 | 175 | 165.6 | | 0 | 128-6 | 15.04 | 34.11 | 126.8 | 2 | 135 | 152 | 150 | 140 | 146.1 | | 0 | 80-1 | 14.34 | 32.41 | 126.0 | 2 | 137 | 158 | 186 | 185 | 172.6 | | 0 | 120-11 | 13.49 | 30.44 | 125.6 | 2 | 160 | 136 | 137 | 133 | 138.6 | | 0 | 72-3 | 15.11 | 34.03 | 125.2 | 2 | 192 | 178 | 184 | 149 | 174.8 | | 0 | 120-8 | 13.29 | 29.76 | 123.9 | 2 | 136 | 143 | 129 | 137 | 135.4 | | 0 | 128-7 | 16.10 | 35.96 | 123.4 | 2 | 125 | 150 | 148 | 146 | 145.1 | | 0 | 128-10 | 14.97 | 33.06 | 120.8 | 2 | 150 | 161 | 157 | 139 | 152.6 | | 0 | 80-3 | 14.02 | 30.49 | 117.5 | 2 | 141 | 140 | 156 | 140 | 146.1 | | 0 | 72-1 | 14.9 | 32.19 | 116.0 | 3 | 121 | 153 | 178 | 152 | 158.1 | | 0 | 120-9 | 14.23 | 30.31 | 113.0 | 3 | 151 | 172 | 165 | 166 | 165.3 | | 0 | 128-5 | 16.21 | 34.33 | 111.8 | 3 | 151 | 125 | 112 | 163 | 132.9 | | 0 | 80-2 | 13.38 | 28.28 | 111.4 | 3 | 134 | 128 | 151 | 181 | 150.6 | | 0 | 72-4 | 15.41 | 32.51 | 111.0 | 3 | 135 | 188 | 196 | 155 | 176.1 | | 0 | 128-9 | 15.54 | 32.75 | 110.7 | 3 | 156 | 139 | 147 | 145 | 145.6 | | 0 | 80-4 | 13.48 | 28.34 | 110.2 | 3 | 140 | 164 | 153 | 145 | 152.1 | | 0 | 120-10 | 15.73 | 31.89 | 102.7 | 3 | 151 | 135 | 132 | 117 | 131.4 | | 0 | 128-8 | 17.26 | 33.93 | 96.6 | 3 | 118 | 135 | 133 | 120 | 128.4 | | 6 | 85-7 | 6.83 | 25.65 | 275.5 | 1 | 159 | 173 | 157 | 137 | 156.3 | | 6 | 89-1 | 8.22 | 25.83 | 214.2 | 1 | 124 | 152 | 147 | 115 | 137.4 | | 6 | 85-10 | 7.82 | 24.43 | 212.4 | 1 | 176 | 208 | 216 | 170 | 197.5 | | 6 | 85-2 | 9.43 | 29.13 | 208.9 | 1 | 154 | 194 | 222 | 172 | 194.0 | | 6 | 85-1 | 9.97 | 29.84 | 199.3 | 1 | 159 | 213 | 207 | 211 | 203.5 | | 6 | 85-6 | 10.91 | 31.4 | 187.8 | 1 | 182 | 215 | 230 | 215 | 216.5 | | 6 | 85-4 | 10.68 | 30.29 | 183.6 | 1 | 146 | 176 | 190 | 169 | 175.8 | | 6 | 138-9 | 8.90 | 25.17 | 182.8 | 1 | 121 | 155 | 153 | 132 | 144.3 | | 6 | 85-8 | 11.35 | 31.8 | 180.2 | 1 | 163 | 165 | 177 | 126 | 159.5 | | 6 | 85-5 | 10.74 | 29.68 | 176.4 | 1 | 206 | 311 | 251 | 163 | 238.4 | | 6 | 84-7 | 8.6 | 23.67 | 175.2 | 1 | 132 | 134 | 140 | 140 | 137.5 | | 6 | 85-9 | 11.6 | 31.5 | 171.6 | 1 | 153 | 145 | 195 | 169 | 170.8 | | 6 | 85-3 | 11.4 | 30.87 | 170.8 | 1 | 147 | 169 | 190 | 183 | 177.6 | | 6 | 138-11 | 11.27 | 28.91 | 156.5 | 1 | 201 | 211 | 193 | 182 | 195.8 | | 6 | 140-6 | 11.61 | 29.67 | 155.6 | 1 | 160 | 145 | 144 | 144 | 146.3 | | 6 | 140-8 | 11.88 | 30.05 | 152.9 | 1 | 161 | 141 | 97 | 82 | 112.3 | | 6 | 76-2 | 12.43 | 31.12 | 150.4 | 1 | 118 | 176 | 135 | 138 | 143.9 | | 6 | 84-2 | 12.22 | 30.35 | 148.4 | 1 | 148 | 161 | 209 | 139 | 171.9 | | 6 | 143-5 | 11.29 | 28.01 | 148.1 | 1 | 118 | 122 | 121 | 122 | 121.1 | | 6 | 138-7 | 11.59 | 28.25 | 143.7 | 1 | 160 | 148 | 187 | 161 | 167.4 | | 6 | 140-4 | 13.11 | 31.93 | 143.6 | 1 | 161 | 182 | 135 | 135 | 150.0 | | 6 | 84-6 | 12.36 | 29.89 | 141.8 | 1 | 143 | 169 | 200 | 126 | 166.6 | | 6 | 138-14 | 12.18 | 29.42 | 141.5 | 2 | 186 | 203 | 161 | 164 | 175.4 | | 6 | 81-2 | 13.91 | 33.51 | 140.9 | 2 | 139 | 149 | 161 | 132 | 148.0 | | 6 | 76-1 | 13.07 | 31.46 | 140.7 | 2 | 162 | 180 | 196 | 195 | 187.5 | | 6 | 138-12 | 12.56 | 30.11 | 139.7 | 2 | 190 | 198 | 173 | 157 | 177.4 | | 6 | 140-5 | 13.04 | 31.13 | 138.7 | 2 | 148 | 196 | 150 | 123 | 154.5 | | 6 | 76-4 | 12.62 | 30.12 | 138.7 | 2 | 154 | 157 | 160 | 184 | 164.5 | | 6 | 140-7 | 13.14 | 31.36 | 138.7 | 2 | 175 | 167 | 177 | 158 | 169.5 | | 6 | 143-4 | 12.27 | 29.25 | 138.4 | 2 | 133 | 135 | 140 | 128 | 134.9 | | 6 | 143-9 | 13.19 | 31.41 | 138.1 | 2 | 136 | 134 | 146 | 125 | 136.5 | | 6 | 143-12 | 12.87 | 30.38 | 136.1 | 2 | 122 | 121 | 114 | 97 | 112.5 | | 6 | 84-1 | 13.17 | 31.04 | 135.7 | 2 | 147 | 136 | 151 | 122 | 139.5 | | 6 | 143-8 | 12.72 | 29.91 | 135.1 | 2 | 94 | 117 | 134 | 98 | 115.8 | | 6 | 76-5 | 13.48 | 31.55 | 134.1 | 2 | 140 | 202 | 176 | 204 | 185.0 | | 6 | 140-12 | 13.45 | 31.26 | 132.4 | 2 | 156 | 141 | 145 | 159 | 148.9 | | 6 | 81-4 | 12.32 | 28.5 | 131.3 | 2 | 163 | 187 | 189 | 168 | 180.0 | | 6 | 143-10 | 12.62 | 29.07 | 130.3 | 2 | 85 | 94 | 88 | 82 | 87.6 | | 6 | 140-9 | 14.59 | 33.55 | 130.0 | 2 | 166 | 142 | 149 | 141 | 147.4 | | 6 | 76-3 | 13.24 | 30.43 | 129.8 | 2 | 155 | 146 | 159 | 142 | 151.0 | | 6 | 84-4 | 12.88 | 29.56 | 129.5 | 2 | 126 | 172 | 154 | 147 | 153.3 | | 6 | 86-1 | 16.42 | 37.5 | 128.4 | 2 | 134 | 149 | 143 | 147 | 144.4 | | 6 | 138-8 | 13.41 | 30.49 | 127.4 | 2 | 120 | 152 | 155 | 150 | 148.6 | | 6 | 143-11 | 12.70 | 28.81 | 126.9 | 2 | 113 | 131 | 113 | 113 | 117.5 | | 6 | 138-13 | 11.77 | 26.59 | 125.9 | 3 | 161 | 186 | 184 | 172 | 178.6 | | 6 | 81-1 | 15.07 | 33.95 | 125.3 | 3 | 141 | 155 | 177 | 145 | 159.0 | | 6 | 140-11 | 13.60 | 30.63 | 125.2 | 3 | 171 | 143 | 157 | 150 | 153.5 | | 6 | 140-10 | 13.03 | 29.15 | 123.7 | 3 | 158 | 175 | 153 | 139 | 155.6 | | 6 | 89-3 | 14.16 | 31.6 | 123.2 | 3 | 139 | 179 | 139 | 120 | 144.3 | | 6 | 84-9 | 13.19 | 29.35 | 122.5 | 3 | 129 | 153 | 203 | 125 | 161.6 | | 6 | 143-14 | 12.60 | 27.58 | 118.9 | 3 | 127 | 126 | 126 | 140 | 129.6 | | 6 | 138-10 | 12.95 | 28.23 | 118.0 | 3 | 153 | 164 | 193 | 136 | 166.5 | | 6 | 84-8 | 14.88 | 32.43 | 117.9 | 3 | 137 | 153 | 185 | 132 | 157.8 | | 6 | 86-7 | 15 | 32.5 | 116.7 | 3 | 125 | 140 | 147 | 135 | 139.5 | | 6 | 143-6 | 12.96 | 27.98 | 115.9 | 3 | 118 | 128 | 143 | 134 | 133.9 | | 6 | 81-3 | 14.41 | 31.03 | 115.3 | 3 | 158 | 202 | 174 | 128 | 167.5 | | 6 | 86-3 | 15.9 | 34.21 | 115.2 | 3 | 190 | 162 | 174 | 150 | 167.0 | | 6 | 86-4 | 15.52 | 33.38 | 115.1 | 3 | 139 | 140 | 150 | 140 | 143.6 | | 6 | 84-3 | 14.1 | 30.29 | 114.8 | 3 | 123 | 151 | 126 | 124 | 131.4 | | 6 | 86-5 | 15.68 | 33.41 | 113.1 | 3 | 131 | 134 | 130 | 117 | 127.9 | | 6 | 89-4 | 14.73 | 31.32 | 112.6 | 3 | 174 | 161 | 155 | 134 | 153.6 | | 6 | 89-2 | 15.29 | 32.47 | 112.4 | 3 | 155 | 198 | 173 | 156 | 172.8 | | 6 | 86-6 | 16.28 | 34.44 | 111.5 | 3 | 153 | 145 | 149 | 130 | 143.8 | | 6 | 84-5 | 15.01 | 31.25 | 108.2 | 3 | 147 | 176 | 179 | 133 | 162.8 | | 6 | 143-7 | 13.24 | 27.51 | 107.8 | 3 | 118 | 99 | 100 | 101 | 102.3 | | 6 | 86-2 | 16.25 | 32.66 | 101.0 | 3 | 164 | 141 | 159 | 142 | 150.9 | | 60 | 90-4 | 12.3 | 30.61 | 148.9 | 1 | 138 | 181 | 156 | 116 | 150.0 | | 60 | 71-1 | 11.78 | 29 | 146.2 | 1 | 177 | 206 | 221 | 200 | 206.5 | | 60 | 90-3 | 13.29 | 30.93 | 132.7 | 1 | 161 | 158 | 172 | 166 | 165.6 | | 60 | 90-7 | 13.76 | 31.97 | 132.3 | 1 | 125 | 139 | 137 | 120 | 131.8 | | 60 | 71-3 | 15.03 | 34.88 | 132.1 | 1 | 157 | 198 | 193 | 154 | 180.0 | | 60 | 78-2 | 13.69 | 31.42 | 129.5 | 1 | 131 | 174 | 168 | 137 | 157.1 | | 60 | 78-5 | 13.96 | 31.96 | 128.9 | 1 | 148 | 165 | 163 | 164 | 161.9 | | 60 | 78-4 | 13.77 | 31.45 | 128.4 | 1 | 135 | 167 | 204 | 209 | 187.4 | | 60 | 73-1 | 16.02 | 36.52 | 128.0 | 1 | 144 | 158 | 122 | 170 | 145.8 | | 60 | 78-1 | 13.18 | 29.55 | 124.2 | 1 | 158 | 164 | 158 | 164 | 161.0 | | 60 | 71-2 | 13.06 | 29.16 | 123.3 | 2 | 136 | 209 | 167 | 190 | 179.4 | | 60 | 90-5 | 13.46 | 30.01 | 123.0 | 2 | 125 | 143 | 140 | 119 | 133.6 | | 60 | 78-3 | 13.44 | 29.59 | 120.2 | 2 | 103 | 140 | 163 | 125 | 140.3 | | 60 | 90-2 | 13.7 | 30.11 | 119.8 | 2 | 149 | 188 | 197 | 211 | 192.3 | | 60 | 125-13 | 15.33 | 33.36 | 117.6 | 2 | 136 | 135 | 141 | 123 | 134.4 | | 60 | 90-6 | 14.51 | 31.41 | 116.5 | 2 | 152 | 164 | 176 | 141 | 161.3 | | 60 | 71-4 | 14.85 | 31.67 | 113.3 | 2 | 170 | 160 | 166 | 153 | 161.8 | | 60 | 125-12 | 13.88 | 29.52 | 112.7 | 2 | 150 | 164 | 163 | 155 | 159.6 | | 60 | 107-2 | 13.55 | 28.26 | 108.6 | 2 | 181 | 176 | 188 | 158 | 176.7 | | 60 | 125-11 | 15.21 | 31.64 | 108.0 | 2 | 129 | 139 | 163 | 169 | 154.3 | | 60 | 107-3 | 13.79 | 28.54 | 107.0 | 3 | 140 | 146 | 144 | 129 | 140.3 | | 60 | 78-6 | 14.44 | 29.75 | 106.0 | 3 | 138 | 140 | 155 | 134 | 143.9 | | 60 | 73-3 | 16.3 | 33.26 | 104.0 | 3 | 165 | 130 | 163 | 184 | 160.3 | | 60 | 73-2 | 15.78 | 32.07 | 103.2 | 3 | 132 | 171 | 181 | 171 | 169.9 | | 60 | 107-4 | 13.86 | 28.09 | 102.7 | 3 | 134 | 158 | 220 | 141 | 174.0 | | 60 | 107-1 | 14.98 | 29.84 | 99.2 | 3 | 146 | 165 | 172 | 152 | 162.0 | | 60 | 125-10 | 15.32 | 30.41 | 98.5 | 3 | 122 | 143 | 153 | 143 | 144.1 | | 60 | 125-9 | 15.29 | 29.71 | 94.3 | 3 | 114 | 150 | 155 | 151 | 147.6 | | 60 | 107-5 | 15.05 | 28.65 | 90.4 | 3 | 152 | 182 | 172 | 162 | 169.5 | | 60 | 125-8 | 14.92 | 27.18 | 82.2 | 3 | 119 | 144 | 157 | 112 | 137.8 | | 600 | 88-10 | 7.79 | 25.48 | 227.1 | 1 | . | . | . | . | . | | 600 | 88-6 | 11.3 | 31.74 | 180.9 | 1 | 165 | 182 | 168 | 145 | 165.4 | | 600 | 88-1 | 10.76 | 29.94 | 178.3 | 1 | 152 | 148 | 131 | 104 | 131.1 | | 600 | 88-9 | 10.58 | 29.02 | 174.3 | 1 | . | . | . | . | . | | 600 | 88-8 | 11.33 | 30.08 | 165.5 | 1 | 154 | 202 | 203 | 155 | 184.6 | | 600 | 88-7 | 12.13 | 31.87 | 162.7 | 1 | 150 | 193 | 150 | 115 | 152.0 | | 600 | 88-2 | 12.22 | 31.94 | 161.4 | 1 | 166 | 163 | 159 | 121 | 151.4 | | 600 | 88-5 | 11.9 | 30.66 | 157.6 | 1 | 154 | 188 | 170 | 151 | 167.8 | | 600 | 74-4 | 11.56 | 29.61 | 156.1 | 1 | 138 | 136 | 144 | 125 | 136.5 | | 600 | 103-6 | 10.08 | 24.95 | 147.5 | 1 | 134 | 144 | 145 | 125 | 138.4 | | 600 | 74-2 | 12.9 | 30.92 | 139.7 | 1 | 117 | 178 | 158 | 134 | 151.9 | | 600 | 103-5 | 12.72 | 30.21 | 137.5 | 1 | 160 | 159 | 142 | 134 | 146.5 | | 600 | 74-1 | 13.84 | 32.59 | 135.5 | 1 | 108 | 163 | 164 | 134 | 149.3 | | 600 | 74-5 | 12.74 | 29.81 | 134.0 | 1 | 118 | 123 | 114 | 133 | 121.5 | | 600 | 74-3 | 13.87 | 32.42 | 133.7 | 1 | 125 | 122 | 132 | 117 | 124.9 | | 600 | 123-10 | 13.57 | 31.61 | 132.9 | 1 | 143 | 168 | 191 | 180 | 176.5 | | 600 | 92-6 | 13.82 | 31.68 | 129.2 | 1 | 151 | 158 | 154 | 140 | 151.1 | | 600 | 92-2 | 15.28 | 34.94 | 128.7 | 1 | 119 | 150 | 159 | 127 | 143.8 | | 600 | 127-10 | 12.46 | 28.39 | 127.8 | 2 | 129 | 130 | 193 | 132 | 154.0 | | 600 | 127-11 | 12.52 | 28.50 | 127.6 | 2 | 138 | 150 | 216 | 141 | 171.0 | | 600 | 92-3 | 14.41 | 32.6 | 126.2 | 2 | 144 | 154 | 160 | 162 | 157.0 | | 600 | 103-3 | 13.6 | 30.45 | 123.9 | 2 | 154 | 147 | 137 | 128 | 139.4 | | 600 | 103-8 | 15.14 | 33.59 | 121.9 | 2 | 164 | 165 | 137 | 150 | 150.6 | | 600 | 103-7 | 14.65 | 32.06 | 118.8 | 2 | 146 | 132 | 126 | 122 | 129.0 | | 600 | 123-8 | 12.68 | 27.64 | 118.0 | 2 | 111 | 147 | 157 | 110 | 137.0 | | 600 | 92-5 | 14.83 | 32.19 | 117.1 | 2 | 142 | 168 | 144 | 133 | 147.0 | | 600 | 92-1 | 15.57 | 33.46 | 114.9 | 2 | 163 | 157 | 172 | 137 | 158.4 | | 600 | 103-4 | 15.41 | 32.8 | 112.8 | 2 | 162 | 171 | 172 | 162 | 168.0 | | 600 | 123-11 | 14.82 | 31.52 | 112.7 | 2 | 156 | 192 | 188 | 171 | 180.8 | | 600 | 123-12 | 14.32 | 30.43 | 112.5 | 2 | 141 | 172 | 166 | 138 | 157.4 | | 600 | 92-4 | 14.37 | 30.05 | 109.1 | 2 | 134 | 142 | 151 | 133 | 142.1 | | 600 | 127-12 | 13.77 | 28.63 | 107.9 | 2 | 155 | 141 | 143 | 137 | 142.5 | | 600 | 103-2 | 14.55 | 30.23 | 107.8 | 2 | 140 | 152 | 154 | 142 | 148.8 | | 600 | 106-6 | 12.51 | 25.91 | 107.1 | 2 | 113 | 109 | 80 | 99 | 95.9 | | 600 | 106-1 | 16.12 | 33.32 | 106.7 | 2 | 185 | 209 | 208 | 167 | 195.1 | | 600 | 137-10 | 13.05 | 26.54 | 103.4 | 3 | 137 | 142 | 135 | 137 | 137.5 | | 600 | 137-4 | 15.40 | 30.78 | 99.9 | 3 | 114 | 167 | 134 | 115 | 135.0 | | 600 | 103-1 | 14.19 | 28.14 | 98.3 | 3 | 160 | 168 | 158 | 159 | 161.0 | | 600 | 130-6 | 17.33 | 34.35 | 98.2 | 3 | 110 | 146 | 169 | 114 | 142.1 | | 600 | 106-2 | 15.74 | 31.12 | 97.7 | 3 | 147 | 184 | 183 | 154 | 171.5 | | 600 | 106-3 | 15.05 | 29.54 | 96.3 | 3 | 160 | 143 | 165 | 131 | 150.4 | | 600 | 137-5 | 15.72 | 30.78 | 95.8 | 3 | 104 | 206 | 172 | 129 | 161.3 | | 600 | 137-6 | 15.18 | 29.51 | 94.4 | 3 | 125 | 184 | 137 | 139 | 147.8 | | 600 | 137-7 | 16.29 | 31.44 | 93.0 | 3 | 113 | 141 | 145 | 119 | 133.5 | | 600 | 123-9 | 15.04 | 28.70 | 90.8 | 3 | 132 | 136 | 154 | 126 | 139.8 | | 600 | 137-8 | 15.80 | 30.11 | 90.6 | 3 | 140 | 149 | 155 | 147 | 149.6 | | 600 | 106-5 | 16.36 | 30.57 | 86.9 | 3 | 165 | 178 | 170 | 141 | 164.1 | | 600 | 130-4 | 17.59 | 32.67 | 85.7 | 3 | 123 | 137 | 143 | 128 | 135.3 | | 600 | 130-9 | 19.19 | 35.54 | 85.2 | 3 | 123 | 142 | 142 | 140 | 139.1 | | 600 | 130-8 | 17.76 | 32.35 | 82.2 | 3 | 126 | 135 | 168 | 108 | 139.5 | | 600 | 137-9 | 14.56 | 25.91 | 78.0 | 3 | 117 | 156 | 142 | 146 | 143.4 | | 600 | 106-4 | 17.12 | 29.89 | 74.6 | 3 | 120 | 158 | 159 | 136 | 148.1 | | 600 | 130-5 | 17.77 | 30.83 | 73.5 | 3 | 98 | 127 | 122 | 114 | 118.3 | |
| --- | --- | --- | --- | --- | --- | --- | --- | --- | --- | --- | --- | --- | --- | --- | --- | --- | --- | --- | --- | --- | --- | --- | --- | --- | --- | --- | --- | --- | --- | --- | --- | --- | --- | --- | --- | --- | --- | --- | --- | --- | --- | --- | --- | --- | --- | --- | --- | --- | --- | --- | --- | --- | --- | --- | --- | --- | --- | --- | --- | --- | --- | --- | --- | --- | --- | --- | --- | --- | --- | --- | --- | --- | --- | --- | --- | --- | --- | --- | --- | --- | --- | --- | --- | --- | --- | --- | --- | --- | --- | --- | --- | --- | --- | --- | --- | --- | --- | --- | --- | --- | --- | --- | --- | --- | --- | --- | --- | --- | --- | --- | --- | --- | --- | --- | --- | --- | --- | --- | --- | --- | --- | --- | --- | --- | --- | --- | --- | --- | --- | --- | --- | --- | --- | --- | --- | --- | --- | --- | --- | --- | --- | --- | --- | --- | --- | --- | --- | --- | --- | --- | --- | --- | --- | --- | --- | --- | --- | --- | --- | --- | --- | --- | --- | --- | --- | --- | --- | --- | --- | --- | --- | --- | --- | --- | --- | --- | --- | --- | --- | --- | --- | --- | --- | --- | --- | --- | --- | --- | --- | --- | --- | --- | --- | --- | --- | --- | --- | --- | --- | --- | --- | --- | --- | --- | --- | --- | --- | --- | --- | --- | --- | --- | --- | --- | --- | --- | --- | --- | --- | --- | --- | --- | --- | --- | --- | --- | --- | --- | --- | --- | --- | --- | --- | --- | --- | --- | --- | --- | --- | --- | --- | --- | --- | --- | --- | --- | --- | --- | --- | --- | --- | --- | --- | --- | --- | --- | --- | --- | --- | --- | --- | --- | --- | --- | --- | --- | --- | --- | --- | --- | --- | --- | --- | --- | --- | --- | --- | --- | --- | --- | --- | --- | --- | --- | --- | --- | --- | --- | --- | --- | --- | --- | --- | --- | --- | --- | --- | --- | --- | --- | --- | --- | --- | --- | --- | --- | --- | --- | --- | --- | --- | --- | --- | --- | --- | --- | --- | --- | --- | --- | --- | --- | --- | --- | --- | --- | --- | --- | --- | --- | --- | --- | --- | --- | --- | --- | --- | --- | --- | --- | --- | --- | --- | --- | --- | --- | --- | --- | --- | --- | --- | --- | --- | --- | --- | --- | --- | --- | --- | --- | --- | --- | --- | --- | --- | --- | --- | --- | --- | --- | --- | --- | --- | --- | --- | --- | --- | --- | --- | --- | --- | --- | --- | --- | --- | --- | --- | --- | --- | --- | --- | --- | --- | --- | --- | --- | --- | --- | --- | --- | --- | --- | --- | --- | --- | --- | --- | --- | --- | --- | --- | --- | --- | --- | --- | --- | --- | --- | --- | --- | --- | --- | --- | --- | --- | --- | --- | --- | --- | --- | --- | --- | --- | --- | --- | --- | --- | --- | --- | --- | --- | --- | --- | --- | --- | --- | --- | --- | --- | --- | --- | --- | --- | --- | --- | --- | --- | --- | --- | --- | --- | --- | --- | --- | --- | --- | --- | --- | --- | --- | --- | --- | --- | --- | --- | --- | --- | --- | --- | --- | --- | --- | --- | --- | --- | --- | --- | --- | --- | --- | --- | --- | --- | --- | --- | --- | --- | --- | --- | --- | --- | --- | --- | --- | --- | --- | --- | --- | --- | --- | --- | --- | --- | --- | --- | --- | --- | --- | --- | --- | --- | --- | --- | --- | --- | --- | --- | --- | --- | --- | --- | --- | --- | --- | --- | --- | --- | --- | --- | --- | --- | --- | --- | --- | --- | --- | --- | --- | --- | --- | --- | --- | --- | --- | --- | --- | --- | --- | --- | --- | --- | --- | --- | --- | --- | --- | --- | --- | --- | --- | --- | --- | --- | --- | --- | --- | --- | --- | --- | --- | --- | --- | --- | --- | --- | --- | --- | --- | --- | --- | --- | --- | --- | --- | --- | --- | --- | --- | --- | --- | --- | --- | --- | --- | --- | --- | --- | --- | --- | --- | --- | --- | --- | --- | --- | --- | --- | --- | --- | --- | --- | --- | --- | --- | --- | --- | --- | --- | --- | --- | --- | --- | --- | --- | --- | --- | --- | --- | --- | --- | --- | --- | --- | --- | --- | --- | --- | --- | --- | --- | --- | --- | --- | --- | --- | --- | --- | --- | --- | --- | --- | --- | --- | --- | --- | --- | --- | --- | --- | --- | --- | --- | --- | --- | --- | --- | --- | --- | --- | --- | --- | --- | --- | --- | --- | --- | --- | --- | --- | --- | --- | --- | --- | --- | --- | --- | --- | --- | --- | --- | --- | --- | --- | --- | --- | --- | --- | --- | --- | --- | --- | --- | --- | --- | --- | --- | --- | --- | --- | --- | --- | --- | --- | --- | --- | --- | --- | --- | --- | --- | --- | --- | --- | --- | --- | --- | --- | --- | --- | --- | --- | --- | --- | --- | --- | --- | --- | --- | --- | --- | --- | --- | --- | --- | --- | --- | --- | --- | --- | --- | --- | --- | --- | --- | --- | --- | --- | --- | --- | --- | --- | --- | --- | --- | --- | --- | --- | --- | --- | --- | --- | --- | --- | --- | --- | --- | --- | --- | --- | --- | --- | --- | --- | --- | --- | --- | --- | --- | --- | --- | --- | --- | --- | --- | --- | --- | --- | --- | --- | --- | --- | --- | --- | --- | --- | --- | --- | --- | --- | --- | --- | --- | --- | --- | --- | --- | --- | --- | --- | --- | --- | --- | --- | --- | --- | --- | --- | --- | --- | --- | --- | --- | --- | --- | --- | --- | --- | --- | --- | --- | --- | --- | --- | --- | --- | --- | --- | --- | --- | --- | --- | --- | --- | --- | --- | --- | --- | --- | --- | --- | --- | --- | --- | --- | --- | --- | --- | --- | --- | --- | --- | --- | --- | --- | --- | --- | --- | --- | --- | --- | --- | --- | --- | --- | --- | --- | --- | --- | --- | --- | --- | --- | --- | --- | --- | --- | --- | --- | --- | --- | --- | --- | --- | --- | --- | --- | --- | --- | --- | --- | --- | --- | --- | --- | --- | --- | --- | --- | --- | --- | --- | --- | --- | --- | --- | --- | --- | --- | --- | --- | --- | --- | --- | --- | --- | --- | --- | --- | --- | --- | --- | --- | --- | --- | --- | --- | --- | --- | --- | --- | --- | --- | --- | --- | --- | --- | --- | --- | --- | --- | --- | --- | --- | --- | --- | --- | --- | --- | --- | --- | --- | --- | --- | --- | --- | --- | --- | --- | --- | --- | --- | --- | --- | --- | --- | --- | --- | --- | --- | --- | --- | --- | --- | --- | --- | --- | --- | --- | --- | --- | --- | --- | --- | --- | --- | --- | --- | --- | --- | --- | --- | --- | --- | --- | --- | --- | --- | --- | --- | --- | --- | --- | --- | --- | --- | --- | --- | --- | --- | --- | --- | --- | --- | --- | --- | --- | --- | --- | --- | --- | --- | --- | --- | --- | --- | --- | --- | --- | --- | --- | --- | --- | --- | --- | --- | --- | --- | --- | --- | --- | --- | --- | --- | --- | --- | --- | --- | --- | --- | --- | --- | --- | --- | --- | --- | --- | --- | --- | --- | --- | --- | --- | --- | --- | --- | --- | --- | --- | --- | --- | --- | --- | --- | --- | --- | --- | --- | --- | --- | --- | --- | --- | --- | --- | --- | --- | --- | --- | --- | --- | --- | --- | --- | --- | --- | --- | --- | --- | --- | --- | --- | --- | --- | --- | --- | --- | --- | --- | --- | --- | --- | --- | --- | --- | --- | --- | --- | --- | --- | --- | --- | --- | --- | --- | --- | --- | --- | --- | --- | --- | --- | --- | --- | --- | --- | --- | --- | --- | --- | --- | --- | --- | --- | --- | --- | --- | --- | --- | --- | --- | --- | --- | --- | --- | --- | --- | --- | --- | --- | --- | --- | --- | --- | --- | --- | --- | --- | --- | --- | --- | --- | --- | --- | --- | --- | --- | --- | --- | --- | --- | --- | --- | --- | --- | --- | --- | --- | --- | --- | --- | --- | --- | --- | --- | --- | --- | --- | --- | --- | --- | --- | --- | --- | --- | --- | --- | --- | --- | --- | --- | --- | --- | --- | --- | --- | --- | --- | --- | --- | --- | --- | --- | --- | --- | --- | --- | --- | --- | --- | --- | --- | --- | --- | --- | --- | --- | --- | --- | --- | --- | --- | --- | --- | --- | --- | --- | --- | --- | --- | --- | --- | --- | --- | --- | --- | --- | --- | --- | --- | --- | --- | --- | --- | --- | --- | --- | --- | --- | --- | --- | --- | --- | --- | --- | --- | --- | --- | --- | --- | --- | --- | --- | --- | --- | --- | --- | --- | --- | --- | --- | --- | --- | --- | --- | --- | --- | --- | --- | --- | --- | --- | --- | --- | --- | --- | --- | --- | --- | --- | --- | --- | --- | --- | --- | --- | --- | --- | --- | --- | --- | --- | --- | --- | --- | --- | --- | --- | --- | --- | --- | --- | --- | --- | --- | --- | --- | --- | --- | --- | --- | --- | --- | --- | --- | --- | --- | --- | --- | --- | --- | --- | --- | --- | --- | --- | --- | --- | --- | --- | --- | --- | --- | --- | --- | --- | --- | --- | --- | --- | --- | --- | --- | --- | --- | --- | --- | --- | --- | --- | --- | --- | --- | --- | --- | --- | --- | --- | --- | --- | --- | --- | --- | --- | --- | --- | --- | --- | --- | --- | --- | --- | --- | --- | --- | --- | --- | --- | --- | --- | --- | --- | --- | --- | --- | --- | --- | --- | --- | --- | --- | --- | --- | --- | --- | --- | --- | --- | --- | --- | --- | --- | --- | --- | --- | --- | --- | --- | --- | --- | --- | --- | --- | --- | --- | --- | --- | --- | --- | --- | --- | --- | --- | --- | --- | --- | --- | --- | --- | --- | --- | --- | --- | --- | --- | --- | --- | --- | --- | --- | --- | --- | --- | --- | --- | --- | --- | --- | --- | --- | --- | --- | --- | --- | --- | --- | --- | --- | --- | --- | --- | --- | --- | --- | --- | --- | --- | --- | --- | --- | --- | --- | --- | --- | --- | --- | --- | --- | --- | --- | --- | --- | --- | --- | --- | --- | --- | --- | --- | --- | --- | --- | --- | --- | --- | --- | --- | --- | --- | --- | --- | --- | --- | --- | --- | --- | --- | --- | --- | --- | --- | --- | --- | --- | --- | --- | --- | --- | --- | --- | --- | --- | --- | --- | --- | --- | --- | --- | --- | --- | --- | --- | --- | --- | --- | --- | --- | --- | --- | --- | --- | --- | --- | --- | --- | --- | --- | --- | --- | --- | --- | --- | --- | --- | --- | --- | --- | --- | --- | --- | --- | --- | --- | --- | --- | --- | --- | --- | --- | --- | --- | --- | --- | --- | --- | --- | --- | --- | --- | --- | --- | --- | --- | --- | --- | --- | --- | --- | --- | --- | --- | --- | --- | --- | --- | --- | --- | --- | --- | --- | --- | --- | --- | --- | --- | --- | --- | --- | --- | --- | --- | --- | --- | --- | --- | --- | --- | --- | --- | --- | --- | --- | --- | --- | --- | --- | --- | --- | --- | --- | --- | --- | --- | --- | --- | --- | --- | --- | --- | --- | --- | --- | --- | --- | --- | --- | --- | --- | --- | --- | --- | --- | --- | --- | --- | --- | --- | --- | --- | --- | --- | --- | --- | --- | --- | --- | --- | --- | --- | --- | --- | --- | --- | --- | --- | --- | --- | --- | --- | --- | --- | --- | --- | --- | --- | --- | --- | --- | --- | --- | --- | --- | --- | --- | --- | --- | --- | --- | --- | --- | --- | --- | --- | --- | --- | --- | --- | --- | --- | --- | --- | --- | --- | --- | --- | --- | --- | --- | --- | --- | --- | --- | --- | --- | --- | --- | --- | --- | --- | --- | --- | --- | --- | --- | --- | --- | --- | --- | --- | --- | --- | --- | --- | --- | --- | --- | --- | --- | --- | --- | --- | --- | --- | --- | --- | --- | --- | --- | --- | --- | --- | --- | --- | --- | --- | --- | --- | --- | --- | --- | --- | --- | --- | --- | --- | --- | --- | --- | --- | --- | --- | --- | --- | --- | --- | --- | --- | --- | --- | --- | --- | --- | --- | --- | --- | --- | --- | --- | --- | --- | --- | --- | --- | --- | --- | --- | --- | --- | --- | --- | --- | --- | --- | --- | --- | --- | --- | --- | --- | --- | --- | --- | --- | --- | --- | --- | --- | --- | --- | --- | --- | --- | --- | --- | --- | --- | --- | --- | --- | --- | --- | --- | --- | --- | --- | --- | --- | --- | --- | --- | --- | --- | --- | --- | --- | --- | --- | --- | --- | --- | --- | --- | --- | --- | --- | --- | --- | --- | --- | --- | --- | --- | --- | --- | --- | --- | --- | --- | --- | --- | --- | --- | --- | --- | --- | --- | --- | --- | --- | --- | --- | --- | --- | --- | --- | --- | --- | --- | --- | --- | --- | --- | --- | --- | --- | --- | --- | --- | --- | --- | --- |
